# Supplementary material for: A Combined Experimental and Theoretical Study on the Immunoassay of Human Immunoglobulin Using a Quartz Crystal Microbalance
Source: MDPI journal article supplement (doi:10.3390/s101211498), 2010-12-15

## Supplementary Information

**Figure 7.** The normalized experimental and simulated binding reaction curves for the 500  $\mu\text{L}$  supplement volume. Here the concentration of the Anti-Human IgG1 solution is **(A)** 50  $\mu\text{g/mL}$ , **(B)** 25  $\mu\text{g/mL}$ , **(C)** 10  $\mu\text{g/mL}$ , and **(D)** 5  $\mu\text{g/mL}$ .

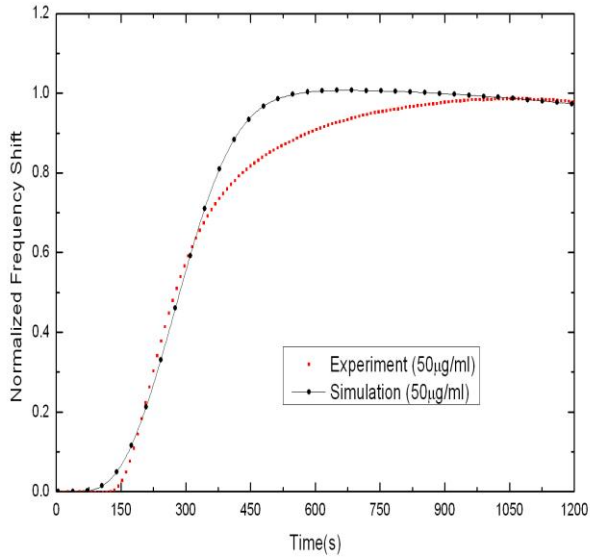

**(A)**

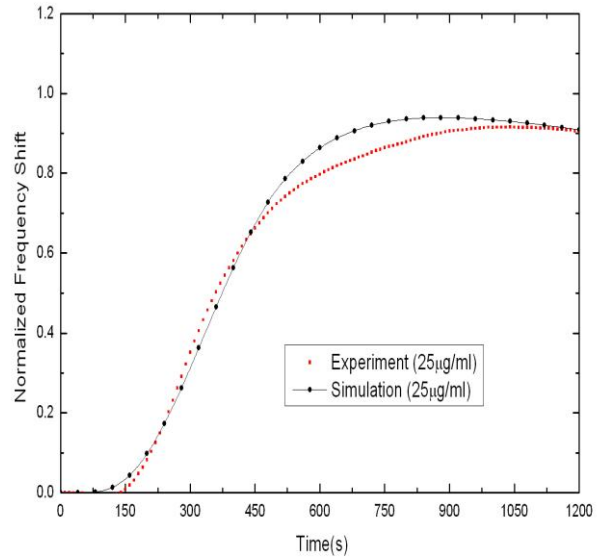

**(B)**

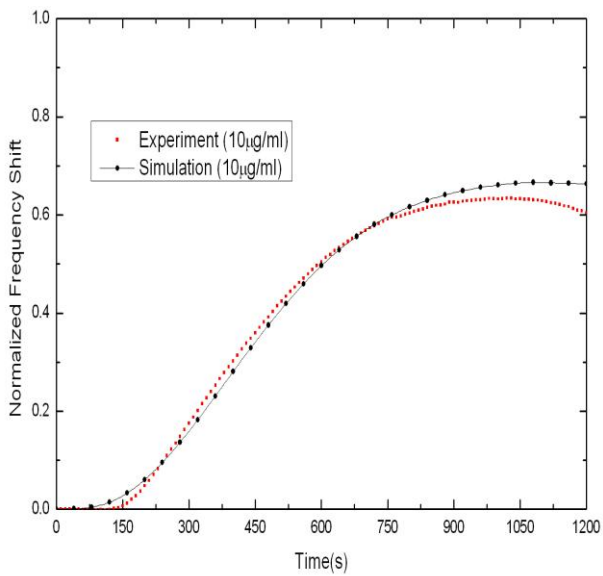

**(C)**

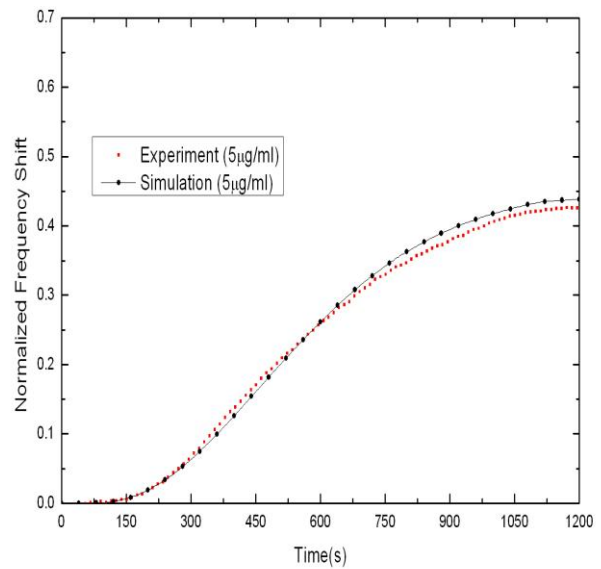

**(D)**

**Figure 8.** The normalized experimental and simulated binding reaction curves for the 100  $\mu$ L supplement volume. Here the concentration of the Anti-Human IgG1 solution is (A) 50  $\mu$ g/mL, (B) 25  $\mu$ g/mL, (C) 10  $\mu$ g/mL, and (D) 5  $\mu$ g/mL.

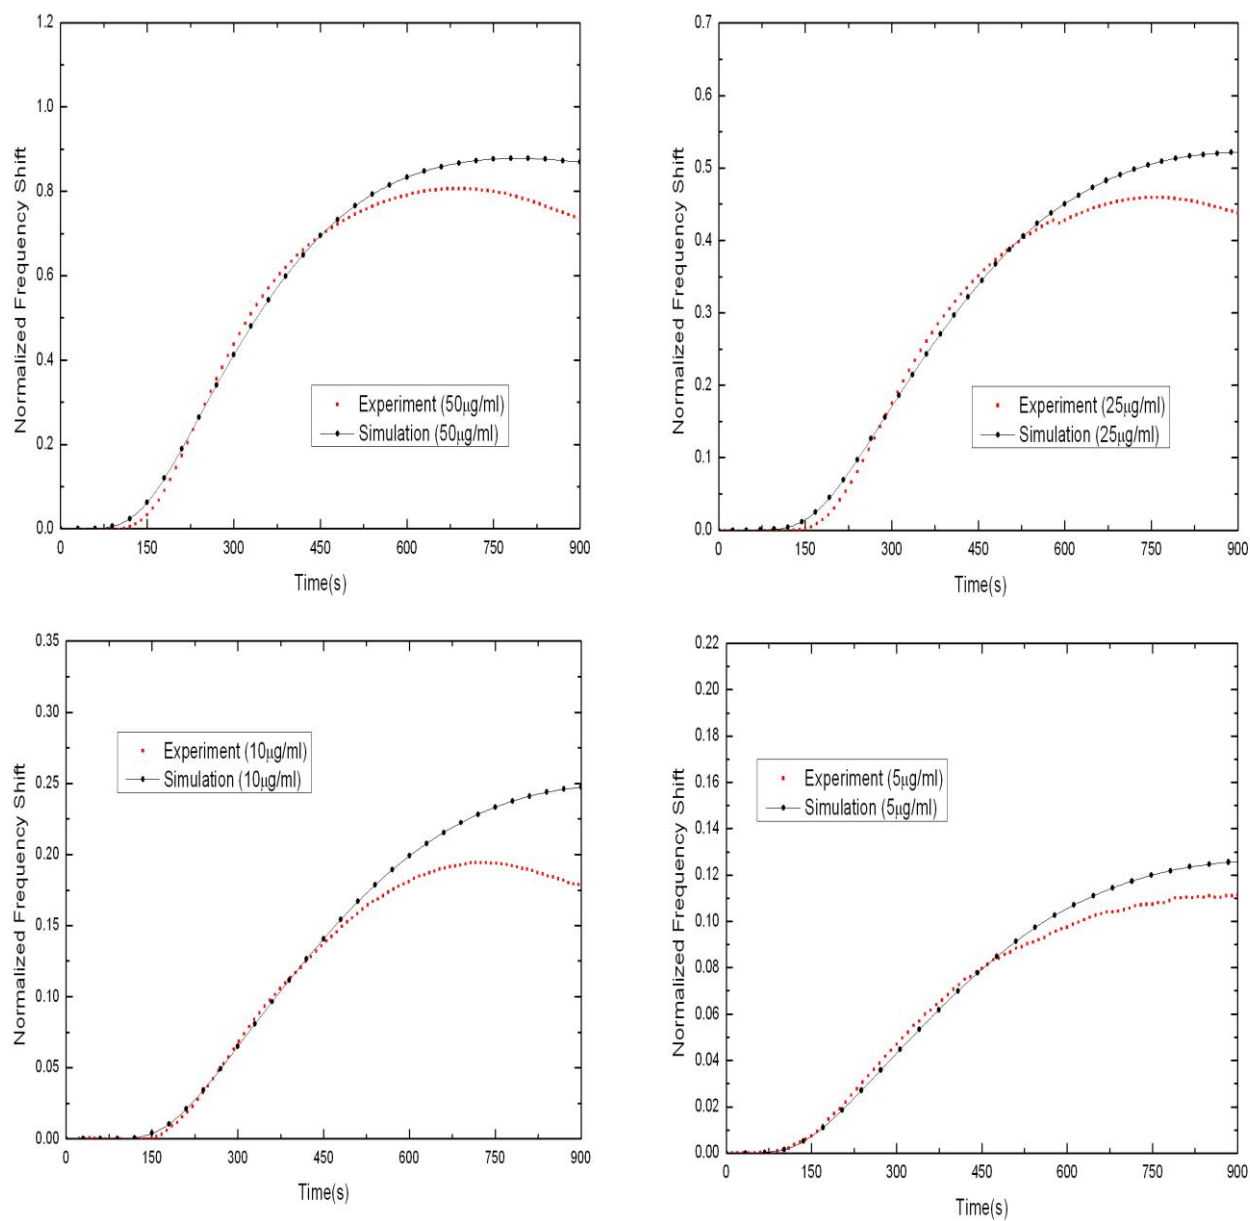

Supplement: s1 [file s1]
